# Supplementary material for: Diagnostic value of tumor-fascia relationship in superficial soft tissue masses on magnetic resonance imaging
Source: PLoS One. 2018 Dec 31;13(12):e0209642. doi: 10.1371/journal.pone.0209642 (PMC6312209; doi:10.1371/journal.pone.0209642)
Supplement: S1 Table — (XLSX) [file pone.0209642.s001.xlsx]

## Sheet: S1.Anonymized minimal data set 
	Clinical information about cases
	Case	Age	Sex	Location	Final Pathological Diagnosis	Size（cm）	Margin	Intratumoral Hemorrhage	Lobulation	Peritumoral Edema	Tumor-fascia Relationship（Galant Classification）
	1	69	M	Chest Wall	Dedifferentiated liposarcoma	5	Irregular	Negative	Positive	Negative	5
	2	71	M	Hand	Angioleiomyoma	1	Well defined	Positive	Negative	Positive	3
	3	52	M	Upper Arm	Lipoma	13	Well defined	Negative	Negative	Negative	3
	4	70	F	Femur	Neurofibroma	7	Well defined	Negative	Positive	Negative	4
	5	62	F	Shoulder	Lipoma	5	Well defined	Negative	Negative	Negative	3
	6	30	F	Hand	Giant cell tumor of tendon sheath	2	Irregular	Positive	Positive	Negative	3
	7	37	F	Shoulder	Lipoma	4	Well defined	Negative	Negative	Negative	3
	8	50	M	Elbow	Angioma	2	Irregular	Positive	Negative	Positive	4
	9	44	F	Hand	Giant cell tumor of tendon sheath	4	Irregular	Positive	Positive	Negative	3
	10	61	M	Neck	Lipoma	2	Well defined	Negative	Negative	Negative	1
	11	74	M	Hip	Atheroma	10	Well defined	Negative	Negative	Negative	1
	12	57	F	Foot	Spindle lipoma	5	Well defined	Negative	Positive	Negative	3
	13	64	F	Hand	Giant cell tumor of tendon sheath	2	Irregular	Positive	Positive	Negative	3
	14	70	F	Back	Gastrointestinal stromal tumor	6	Well defined	Negative	Negative	Negative	4
	15	55	F	Upper Arm	Lipoma	6	Irregular	Positive	Positive	Negative	3
	16	19	F	Hand	Giant cell tumor of tendon sheath	2	Irregular	Positive	Positive	Negative	3
	17	75	F	Neck	Epithelioid sarcoma	8	Irregular	Positive	Positive	Negative	5
	18	53	F	Hand	Schwannoma	2	Well defined	Negative	Negative	Positive	3
	19	84	F	Femur	Dedifferentiated liposarcoma	5	Well defined	Positive	Negative	Positive	3
	20	81	F	Lower Leg	Dedifferentiated liposarcoma	2	Well defined	Positive	Negative	Positive	4
	21	65	F	Foot	Angioleiomyoma	1	Well defined	Positive	Negative	Positive	3
	22	15	M	Lower Leg	Angioma	2	Irregular	Positive	Positive	Positive	4
	23	39	M	Lower Leg	Schwannoma	4	Well defined	Positive	Positive	Positive	3
	24	39	F	Hand	Giant cell tumor of tendon sheath	2	Irregular	Positive	Positive	Negative	5
	25	52	M	Hip	Hematoma	17	Well defined	Positive	Negative	Negative	2
	26	41	M	Upper Arm	Angioleiomyoma	3	Well defined	Positive	Negative	Positive	3
	27	42	F	Forearm	Lipoma	4	Well defined	Negative	Negative	Negative	3
	28	52	F	Upper Arm	Lipoma	5	Well defined	Negative	Negative	Negative	3
	29	66	F	Hand	Angioma	1	Irregular	Positive	Negative	Positive	4
	30	42	F	Back	Schwannoma	9	Well defined	Negative	Negative	Positive	3
	31	43	F	Shoulder	Lipoma	6	Well defined	Negative	Negative	Negative	3
	32	82	M	Chest Wall	Myxofibrosarcoma	4	Well defined	Negative	Negative	Negative	1
	33	45	F	Foot	Synovial sarcoma	1	Well defined	Negative	Negative	Negative	3
	34	25	F	Hip	Malignant epithelioid spindle sarcoma	8	Well defined	Negative	Positive	Negative	1
	35	20	M	Foot	Ganglion	1	Well defined	Negative	Negative	Negative	3
	36	51	F	Lumber	Lipoma	14	Well defined	Negative	Negative	Negative	3
	37	58	M	Hand	Angioleiomyoma	1	Well defined	Positive	Negative	Positive	3
	38	49	M	Hand	Angioma	1	Well defined	Positive	Negative	Positive	3
	39	58	F	Foot	Fibromatosis	3	Irregular	Negative	Positive	Negative	3
	40	28	M	Hand	Giant cell tumor of tendon sheath	1	Irregular	Positive	Negative	Negative	3
	41	47	F	Hand	Atheroma	2	Well defined	Negative	Negative	Negative	2
	42	61	M	Shoulder	Lipoma	13	Well defined	Negative	Negative	Negative	3
	43	46	M	Upper Arm	Ossifying fibromyxoid tumor	3	Well defined	Negative	Negative	Negative	1
	44	30	M	Elbow	Kimura disease	5	Irregular	Positive	Positive	Positive	3
	45	87	M	Femur	Undifferentiated pleomorphic sarcoma	11	Irregular	Positive	Positive	Positive	5
	46	60	F	Hand	Giant cell tumor of tendon sheath	2	Irregular	Positive	Positive	Negative	3
	47	69	F	Shoulder	Lipoma	7	Well defined	Negative	Positive	Negative	3
	48	48	M	Neck	Atheroma	2	Well defined	Negative	Negative	Negative	1
	49	77	M	Hip	Metastatic tumor	4	Well defined	Negative	Negative	Negative	1
	50	79	M	Hip	Pleomorphic liposarcoma	3	Well defined	Negative	Negative	Negative	4
	51	54	M	Foot	Bursitis	2	Well defined	Negative	Negative	Positive	4
	52	38	M	Foot	Schwannoma	1	Well defined	Negative	Negative	Positive	3
	53	78	F	Lower Leg	Low grade fibromyxoid sarcoma	2	Well defined	Negative	Negative	Negative	4
	54	78	F	Femur	Atypical lipomatous tumor	10	Well defined	Negative	Negative	Negative	4
	55	18	F	Elbow	Giant cell tumor of tendon sheath	2	Irregular	Positive	Negative	Negative	4
	56	16	M	Femur	Dermatofibroma	2	Well defined	Positive	Negative	Negative	1
	57	66	M	Shoulder	Lipoma	8	Well defined	Negative	Negative	Negative	3
	58	48	F	Hand	Giant cell tumor of tendon sheath	1	Irregular	Positive	Negative	Negative	4
	59	38	F	Lower Leg	Schwannoma	1	Well defined	Negative	Negative	Positive	3
	60	73	M	Back	Lipoma	3	Well defined	Negative	Negative	Negative	3
	61	64	F	Femur	Pleomorphic liposarcoma	2	Irregular	Negative	Positive	Negative	5
	62	37	M	Hand	Angioleiomyoma	1	Well defined	Positive	Positive	Positive	4
	63	37	M	Femur	Leiomyoma	5	Irregular	Negative	Positive	Negative	5
	64	71	M	Back	Atheroma	4	Well defined	Negative	Negative	Negative	3
	65	68	F	Knee	Atheroma	2	Well defined	Negative	Negative	Negative	3
	66	71	F	Back	Lipoma	14	Well defined	Negative	Negative	Negative	3
	67	52	M	Foot	Fibromatosis	2	Irregular	Negative	Negative	Negative	4
	68	37	M	Femur	Clear cell sarcoma	2	Irregular	Negative	Negative	Negative	5
	69	48	F	Knee	Atheroma	6	Well defined	Negative	Positive	Negative	3
	70	46	M	Elbow	Reactive lymphoid hyperplasia with infiltation of eosinophils	5	Irregular	Negative	Positive	Positive	5
	71	57	M	Knee	Atheroma	2	Well defined	Negative	Negative	Negative	4
	72	39	M	Hand	Neurofibroma	2	Well defined	Negative	Negative	Negative	4
	73	57	M	Femur	Leiomyoma	1	Well defined	Negative	Positive	Negative	2
	74	67	M	Hand	Angioleiomyoma	1	Well defined	Positive	Negative	Positive	4
	75	71	M	Femur	Low grade myxofibrosarcoma	3	Well defined	Negative	Negative	Negative	4
	76	73	F	Hand	Fibromatosis	2	Irregular	Negative	Negative	Negative	5
	77	41	F	Hand	Schwannoma	1	Well defined	Negative	Negative	Positive	3
	78	71	F	Forearm	Dedifferentiated liposarcoma	3	Irregular	Positive	Positive	Positive	5
	79	34	M	Shoulder	Dermatofibrosarcoma	3	Well defined	Negative	Negative	Negative	4
	80	41	F	Lower Leg	Angioleiomyoma	1	Well defined	Positive	Negative	Positive	1
	81	67	M	Neck	Metastatic tumor	3	Well defined	Positive	Negative	Positive	5
	82	65	F	Foot	Fibromatosis	1	Irregular	Negative	Negative	Negative	4
	83	55	F	Neck	Atheroma	3	Well defined	Negative	Negative	Negative	4
	84	83	M	Lower Leg	Leiomyosarcoma	4	Irregular	Negative	Negative	Negative	5
	85	78	F	Foot	Giant cell tumor of tendon sheath	2	Irregular	Positive	Negative	Negative	4
	86	32	F	Hand	Angioma	2	Irregular	Positive	Positive	Positive	5
	87	80	F	Lower Leg	Pleomorphic liposarcoma	5	Irregular	Positive	Negative	Positive	5
	88	63	F	Lower Leg	Atheroma	3	Well defined	Negative	Negative	Negative	3
	89	16	M	Foot	Atheroma	1	Well defined	Negative	Negative	Negative	4
	90	79	F	Lower Leg	Pleomorphic liposarcoma	2	Well defined	Negative	Negative	Positive	4
	91	33	M	Femur	Schwannoma	3	Well defined	Negative	Negative	Positive	2
	92	73	F	Lower Leg	Ganglion	8	Well defined	Negative	Positive	Negative	4
	93	45	M	Femur	Myxoid liposarcoma	4	Well defined	Negative	Negative	Negative	4
	94	49	F	Upper Arm	Lipoma	11	Well defined	Negative	Negative	Negative	3
	95	46	M	Hip	Epithelioid sarcoma	6	Well defined	Positive	Positive	Positive	1
	96	30	F	Hip	Malignant lymphoma	3	Well defined	Negative	Negative	Negative	3
	97	40	F	Lower Leg	Schwannoma	2	Well defined	Negative	Negative	Positive	4
	98	60	M	Lower Leg	Malignant peripheral nerve sheath tumor	2	Well defined	Negative	Positive	Positive	3
	99	64	M	Hand	Fibromatosis	1	Well defined	Negative	Negative	Negative	4
	100	45	F	Back	Lipoma	3	Well defined	Negative	Negative	Negative	1
	101	82	F	Shoulder	Lipoma	15	Well defined	Negative	Negative	Negative	3
	102	35	F	Femur	Schwannoma	3	Well defined	Negative	Negative	Positive	2
	103	44	F	Upper Arm	Lipoma	12	Well defined	Negative	Negative	Negative	3
	104	67	F	Knee	Malignant lymphoma	2	Well defined	Negative	Negative	Negative	1
	105	55	F	Back	Lipoma	6	Well defined	Negative	Negative	Negative	3
	106	41	M	Knee	Atheroma	6	Well defined	Negative	Negative	Negative	3
	107	63	F	Femur	Myxoid liposarcoma	7	Well defined	Negative	Positive	Negative	4
	108	79	M	Femur	Myxoid liposarcoma	3	Well defined	Positive	Negative	Positive	5
	109	14	M	Hand	Giant cell tumor of tendon sheath	1	Irregular	Positive	Negative	Negative	3
	110	71	M	Neck	Lipoma	2	Well defined	Negative	Negative	Negative	3
	111	62	M	Femur	Schwannoma	3	Well defined	Positive	Negative	Positive	3
	112	61	M	Femur	Solitary fibrous tumor	3	Irregular	Negative	Negative	Positive	5
	113	25	M	Lower Leg	Schwannoma	3	Well defined	Negative	Negative	Positive	4
	114	42	F	Foot	Giant cell tumor of tendon sheath	2	Irregular	Positive	Negative	Negative	4
	115	81	F	Neck	Lipoma	5	Well defined	Negative	Negative	Negative	3
	116	36	F	Foot	Schwannoma	2	Well defined	Positive	Negative	Positive	4
	117	40	M	Hand	Epithelioid sarcoma	2	Irregular	Positive	Positive	Positive	5
	118	52	F	Hand	Giant cell tumor of tendon sheath	1	Irregular	Positive	Negative	Negative	4
	119	72	M	Neck	Lipoma	7	Well defined	Negative	Negative	Negative	3
	120	75	M	Hip	Squamous cell carcinoma of unknown primary	7	Irregular	Negative	Positive	Negative	5
	121	70	F	Elbow	Lipoma	3	Well defined	Negative	Negative	Negative	3
	122	27	M	Forearm	Epithelioid sarcoma	10	Irregular	Positive	Positive	Positive	5
	123	41	M	Chest Wall	Pleomorphic liposarcoma	10	Well defined	Positive	Negative	Negative	4
	124	67	M	Femur	Pleomorphic liposarcoma	6	Irregular	Positive	Positive	Positive	5
	125	32	M	Knee	Hematoma	5	Well defined	Positive	Positive	Negative	3
	126	9	F	Back	Pilomatrixoma	1	Well defined	Negative	Negative	Negative	1
	127	63	M	Lower Leg	Schwannoma	7	Well defined	Negative	Positive	Negative	3
	128	67	M	Femur	Pleomorphic liposarcoma	16	Irregular	Negative	Positive	Positive	5
	129	71	F	Forearm	Leiomyosarcoma	8	Irregular	Positive	Positive	Positive	5
	130	35	M	Hand	Neurofibroma	2	Irregular	Negative	Positive	Negative	5
	131	44	F	Femur	Myxoid liposarcoma	9	Well defined	Positive	Positive	Negative	4
	132	74	M	Hand	Atheroma	1	Well defined	Negative	Negative	Negative	4
	133	35	M	Foot	Lipoma	3	Well defined	Negative	Negative	Negative	3
	134	58	M	Hip	Atheroma	9	Well defined	Negative	Positive	Negative	3
	135	32	F	Hand	Angioleiomyoma	2	Well defined	Positive	Negative	Positive	4
	136	83	F	Femur	Leiomyosarcoma	2	Well defined	Negative	Negative	Negative	3
	137	83	M	Shoulder	Leiomyosarcoma	15	Irregular	Positive	Positive	Positive	5
	138	24	F	Shoulder	Schwannoma	1	Well defined	Negative	Negative	Positive	4
	139	62	F	Neck	Lipoma	4	Well defined	Negative	Positive	Negative	3
	140	66	F	Hip	Ewing sarcoma	2	Irregular	Positive	Negative	Negative	5
	141	75	M	Upper Arm	Epithelioid granuloma	1	Irregular	Negative	Negative	Negative	5
	142	10	M	Elbow	Angioma	2	Irregular	Positive	Positive	Positive	3
	143	81	M	Hip	Malignant lymphoma	4	Well defined	Negative	Negative	Negative	2
	144	54	M	Foot	Fibromatosis	1	Well defined	Negative	Negative	Negative	1
	145	53	F	Hand	Giant cell tumor of tendon sheath	1	Irregular	Positive	Positive	Negative	5
	146	16	M	Foot	Giant cell tumor of tendon sheath	2	Irregular	Positive	Positive	Positive	5
	147	68	M	Knee	Ganglion	4	Well defined	Negative	Positive	Negative	4
	148	71	M	Neck	Bursitis	5	Well defined	Negative	Positive	Positive	3
	149	65	F	Forearm	Myxofibrosarcoma	5	Irregular	Negative	Positive	Positive	5
	150	42	M	Foot	Synovial sarcoma	3	Well defined	Negative	Negative	Negative	1
	151	1	M	Foot	Fibromatosis	3	Well defined	Negative	Negative	Negative	2
	152	48	M	Femur	Dedifferentiated liposarcoma	10	Well defined	Negative	Positive	Positive	4
	153	55	F	Foot	Giant cell tumor of tendon sheath	2	Irregular	Positive	Positive	Positive	5
	154	75	M	Hand	Giant cell tumor of tendon sheath	2	Irregular	Positive	Positive	Negative	5
	155	58	M	Neck	Lipoma	13	Well defined	Negative	Positive	Negative	3
	156	66	F	Femur	Malignant lymphoma	1	Well defined	Negative	Negative	Negative	1
	157	49	M	Shoulder	Lipoma	7	Well defined	Negative	Positive	Negative	3
	158	28	F	Hip	Schwannoma	5	Well defined	Negative	Positive	Positive	3
	159	57	M	Femur	Solitary fibrous tumor	8	Well defined	Negative	Positive	Positive	3
	160	71	M	Neck	Lipoma	4	Well defined	Negative	Positive	Negative	3
	161	67	F	Hip	myxofibrosarcoma	6	Well defined	Positive	Positive	Negative	3
	162	31	F	Knee	Atheroma	4	Well defined	Negative	Positive	Negative	2
	163	46	M	Neck	Lipoma	9	Well defined	Negative	Positive	Negative	3
	164	87	F	Back	Schwannoma	9	Irregular	Positive	Positive	Positive	5
	165	47	F	Lower Leg	Atheroma	2	Well defined	Negative	Negative	Positive	2
	166	65	F	Lower Leg	Schwannoma	2	Well defined	Negative	Negative	Positive	3
	167	74	M	Chest Wall	myxofibrosarcoma	3	Well defined	Positive	Positive	Negative	5
	168	38	F	Forearm	Giant cell tumor of tendon sheath	2	Irregular	Positive	Negative	Negative	3
	169	11	M	Hand	Calcifying aponeurotic fibroma	1	Irregular	Positive	Positive	Positive	4
	170	71	F	Shoulder	Atypical lipomatous tumor	7	Well defined	Negative	Positive	Negative	3
	171	36	F	Hand	Schwannoma	3	Well defined	Negative	Positive	Positive	3
	172	79	F	Back	Lipoma	5	Well defined	Negative	Negative	Negative	3
	173	80	M	Chest Wall	Undifferentiated pleomorphic sarcoma	2	Well defined	Negative	Positive	Negative	1
	174	55	M	Shoulder	Atypical lipomatous tumor	13	Well defined	Negative	Positive	Negative	3
	175	51	F	Knee	Bursitis	3	Well defined	Positive	Negative	Positive	3
	176	41	M	Back	Lipoma	7	Well defined	Negative	Negative	Negative	3
	177	69	M	Chest Wall	Lipoma	7	Well defined	Negative	Negative	Negative	3
	178	68	M	Back	Metastatic tumor	4	Well defined	Positive	Negative	Positive	1
	179	82	F	Hand	Angioma	1	Irregular	Positive	Negative	Positive	2
	180	85	F	Hip	Leiomyosarcoma	3	Well defined	Positive	Negative	Negative	4
	181	52	M	Hand	Fibromatosis	4	Irregular	Negative	Negative	Negative	4
	182	53	M	Hand	Schwannoma	1	Well defined	Negative	Negative	Positive	2
	183	77	F	Hand	Lipoma	2	Well defined	Negative	Positive	Negative	3
	184	90	M	Hand	Schwannoma	5	Well defined	Positive	Negative	Positive	4
	185	65	M	Back	Lipoma	11	Well defined	Negative	Negative	Negative	3
	186	50	F	Back	Lipoma	5	Well defined	Negative	Negative	Negative	2
	187	87	F	Femur	Lipoma	13	Well defined	Negative	Negative	Negative	3
	188	41	M	Hip	Undifferentiated pleomorphic sarcoma	7	Irregular	Positive	Positive	Positive	5
	189	21	F	Lower Leg	Alveolar soft part sarcoma	7	Irregular	Positive	Positive	Positive	5
	190	61	M	Shoulder	Malignant peripheral nerve sheath tumor	7	Irregular	Positive	Positive	Positive	5
	191	67	M	Shoulder	Pleomorphic liposarcoma	12	Irregular	Positive	Positive	Positive	5
	192	66	M	Upper Arm	Pleomorphic liposarcoma	9	Well defined	Positive	Positive	Positive	4
	193	44	M	Chest Wall	Pleomorphic liposarcoma	11	Irregular	Positive	Positive	Positive	5
	194	67	M	Forearm	Undifferentiated pleomorphic sarcoma	14	Irregular	Positive	Positive	Positive	5
	195	78	M	Chest Wall	Pleomorphic liposarcoma	12	Irregular	Positive	Positive	Positive	5
	196	65	M	Hip	subcutis	2	Well defined	Negative	Negative	Negative	1
	197	43	F	Shoulder	lipoma	6	Well defined	Negative	Positive	Negative	2
	198	40	M	Knee	Atheroma	7	Well defined	Negative	Positive	Negative	3
	199	50	M	Foot	PVNS	2	Irregular	Positive	Negative	Negative	3
	200	75	M	Back	liopma	8	Well defined	Negative	Positive	Negative	1
	201	69	M	Upper Arm	lipoma	6	Well defined	Negative	Positive	Negative	4
	202	78	F	Shoulder	schwannoma	2	Well defined	Negative	Negative	Positive	5
	203	49	M	Femur	Atheroma	9	Well defined	Negative	Positive	Negative	3
	204	54	M	Neck	Pleomorphic lipoma	3	Well defined	Positive	Negative	Positive	3
	205	47	F	Upper Arm	Granuloma	3	Well defined	Negative	Negative	Negative	1
	206	57	M	Neck	lipoma	6	Well defined	Negative	Negative	Negative	3
	207	68	M	Back	Atheroma	2	Well defined	Negative	Negative	Negative	1
	208	66	M	Hand	Giant cell tumor of tendon sheath	4	Irregular	Positive	Positive	Negative	5
	209	72	F	Head	Atypical lipomatous tumor	9	Well defined	Negative	Positive	Negative	3
	210	85	F	Lower Leg	myxofibrosarcoma	3	Well defined	Positive	Positive	Positive	4
	211	76	F	Back	lipoma	5	Well defined	Negative	Positive	Negative	2
	212	78	M	Foot	Gouty tophus	3	Well defined	Negative	Negative	Negative	4
	213	69	M	Upper Arm	lipoma	13	Well defined	Negative	Positive	Negative	3
	214	42	F	Femur	schwannoma	10	Well defined	Positive	Positive	Positive	3
	215	32	F	Hand	Giant cell tumor of tendon sheath	1	Irregular	Positive	Negative	Negative	3
	216	75	M	Foot	Chronic bursitis	3	Well defined	Positive	Negative	Positive	4
	217	67	M	Hand	Giant cell tumor of tendon sheath	3	Irregular	Positive	Positive	Negative	3
	218	81	F	Shoulder	lipoma	9	Well defined	Negative	Positive	Negative	3
	219	63	F	Shoulder	lipoma	6	Well defined	Negative	Positive	Negative	2
